# Supplementary material
Source: Springer Nature journal article supplement (https://www.springermedizin.de/resource/supplementary/12943_2013_1214_MOESM7_ESM.pdf/9552416)
Supplement: MOESM7 [file 9552416]

**A** **uPA mRNA 3' UTR**

NM\_002658

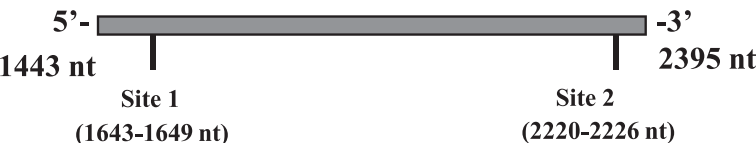**B****Site 1**

5' UGCCCAGACCCUCU-GGCCAGGAU 3' hsa plau  
 | III |IIII|  
 3' UGACCCUGAAACAU-CCGGUCA 5' hsa-miR-193a

5' UGCCCAGACCCUCU-GGCCAGGAU 3' hsa plau  
 5' UGCCCAGACCCUCU-GGCCAGGAU 3' ptr plau  
 5' cauCCAGACCcucCc-GaCCAGGAU 3' mmu plau  
 5' cauCCAGACCaucCU-GaCCAGGAU 3' rno plau  
 5' UGCCCAGAuCuCUugaGGCCAGGAU 3' cfa plau

**Site 2**

5' AGAUGUCCCUUUCUUGGCCAGUU 3' hsa plau  
 |III| |IIIIII|  
 3' UGACCCUGAAACAUCCGGUCA 5' hsa-miR-193a

5' AGAUGUCCCUUUCUUGGCCAGUU 3' hsa plau  
 5' AGAUGUCCCUUUCUUGGCCAGUU 3' ptr plau  
 5' AGAUGUCCacUUCUUGGCCAGUU 3' mmu plau  
 5' AGAUGUCCCcUUCcUGGCCAGUU 3' rno plau  
 5' AGAUGUUC-UUUCUUGGCCAGUU 3' cfa plau
